# Supplementary material for: A genome survey of Moniliophthora perniciosa gives new insights into Witches' Broom Disease of cacao
Source: PubMed Central journal article supplement (PMC2644716; doi:10.1186/1471-2164-9-548), 2008-11-18

## Additional File 8

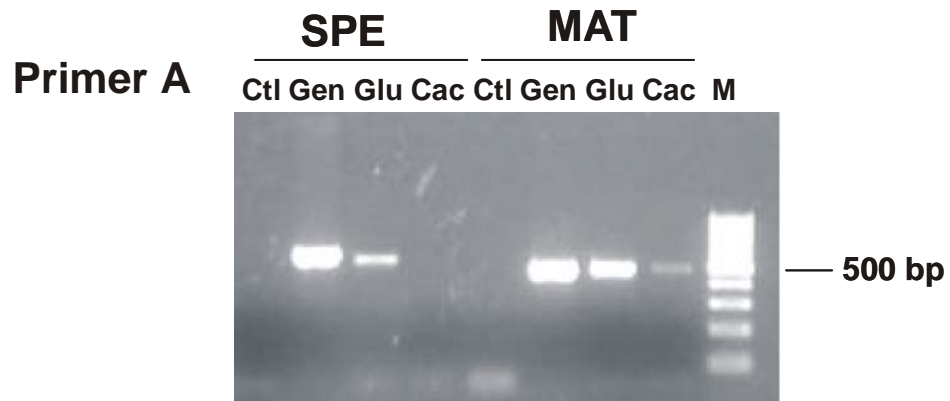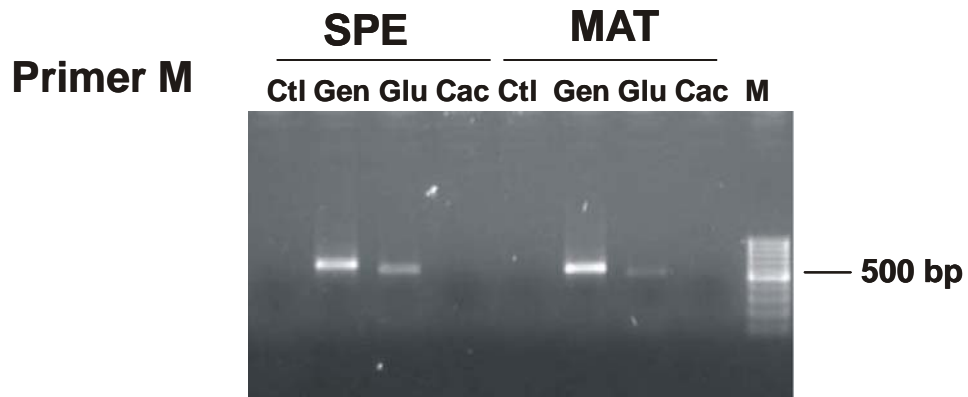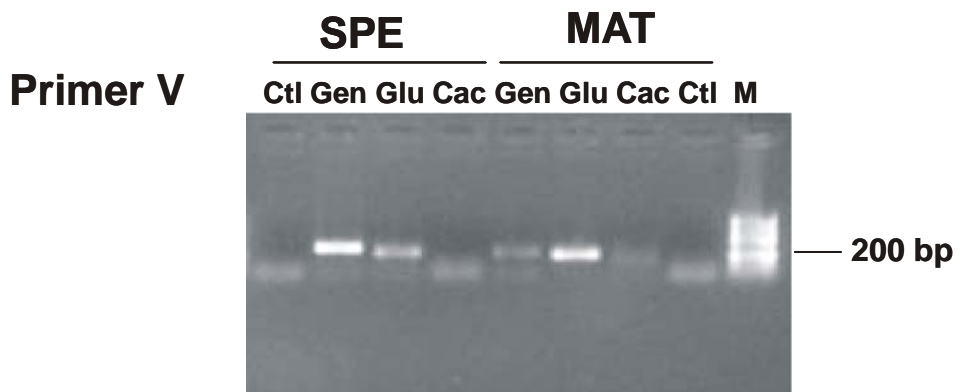

Supplement: 1471-2164-9-548-S8.pdf [file 1471-2164-9-548-S8.pdf]
