# Supplementary material for: A genome survey of Moniliophthora perniciosa gives new insights into Witches' Broom Disease of cacao
Source: PubMed Central journal article supplement (PMC2644716; doi:10.1186/1471-2164-9-548), 2008-11-18
Supplement: 1471-2164-9-548-S9.pdf [file 1471-2164-9-548-S9.pdf]

**Additional File 9: Comparison of plant cell wall degrading enzymes in fungi that interact with plants.**

| Pfam domain <sup>a</sup> | CAZY <sup>b</sup> | MP | MG | FG | CC | PC | NC | LB | UM |
|--------------------------|-------------------|----|----|----|----|----|----|----|----|
| pfam00150                | GH5               | 4  | 10 | 4  | 9  | 11 | 6  | 7  | 6  |
| pfam01341                | GH6               | 3  | 3  | 1  | 0  | 1  | 3  | 0  | 0  |
| pfam00840                | GH7               | 5  | 5  | 2  | 6  | 8  | 6  | 0  | 0  |
| pfam00759                | GH9               | 2  | 0  | 0  | 1  | 1  | 2  | 1  | 1  |
| pfam00331                | GH10              | 8  | 7  | 5  | 6  | 6  | 4  | 0  | 2  |
| pfam00457                | GH11              | 2  | 5  | 2  | 6  | 1  | 2  | 0  | 1  |
| pfam02015                | GH45              | 2  | 1  | 1  | 0  | 0  | 1  | 0  | 3  |
| pfam03443                | GH61              | 13 | 20 | 12 | 33 | 14 | 14 | 7  | 0  |
| pfam00544                | PL1               | 6  | 2  | 9  | 1  | 0  | 0  | 0  | 1  |
| pfam03211                | PL3               | 4  | 1  | 7  | 2  | 0  | 1  | 0  | 0  |
| pfam00295                | GH28              | 4  | 3  | 6  | 3  | 3  | 2  | 8  | 1  |
| pfam01095                | CE8               | 2  | 0  | 3  | 0  | 2  | 1  | 3  | 1  |

a - Number of PFAM domain

b - Nomenclature of plant cell wall degrading enzymes according to CAZy ([www.cazy.org](http://www.cazy.org)).

Mp = *Moniliophthora perniciosa*, Mg = *Magnaporthe grisea*, Fg = *Fusarium graminearum*,

Cc = *Coprinopsis cinerea*, Pc = *Phanerochaete chrysosporium*, Um = *Ustilago maydis*,

Lb = *Laccaria bicolor*
