# Supplementary material for: A genome survey of Moniliophthora perniciosa gives new insights into Witches' Broom Disease of cacao
Source: PubMed Central journal article supplement (PMC2644716; doi:10.1186/1471-2164-9-548), 2008-11-18
Supplement: 1471-2164-9-548-S10.pdf [file 1471-2164-9-548-S10.pdf]

## Genomic survey sequences and Gene models nomenclature

### Genomic survey sequences nomenclature

Genomic survey sequences were identified according to the system established for the Witches' Broom Genome Project, which considers the following data: organism and strain, library construction strategy, library number, plate number, position in 96-well plate, sequencing institution, and primer used for sequencing.

System: LLAA – LA – AAA – NNN – LNN – LL – L  
Exemple: CP02 – EC – 001 – 001 – A01 – UC - F  
                  1      2   3      4      5      6   7

L= Letter; N= Number; A= alpha-numeric

1. Organism refers to the species and isolate used for the study:

- a. CP= *Moniliophthora perniciosa*
- b. 02= isolate CP02

2. Library construction strategy refers to the genomic libraries

- a. S0= genomic shotgun library cut with enzyme *RsaI* to a fragment size of 0.5 to 2 Kb;
- b. S1= genomic shotgun library cut by nebulization to a fragment size of 0.5 to 2 Kb
- c. S3= genomic shotgun library cut by nebulization to a fragment size of 2 to 4 Kb

3. Library number refers to the number of independent ligation and transformation events for each library:

- a. 001= first cloned library
- b. 002=second cloned library, etc.

4. Plate Number refers to the 96-well plate containing individual white colonies from each transformation:

- a. 001= first plate
- b. 002=second plate; etc.

5. Position of clone inside the 96-well plate

- a. A01= row A, column 01; etc.

6. Sequencing institution (<http://www.lge.ibi.unicamp.br/vassoura>):

- a. UC= Universidade Estadual de Campinas (UNICAMP)
- b. UE= Universidade Estadual de Santa Cruz (UESC)
- c. CL= Comissão do Plano da Lavoura Cacaueira (CEPLAC)
- d. EM= EMBRAPA
- e. FS= Universidade Estadual de Feira de Santana

7. Primer used for sequencing:
- F= Forward primer
  - R= Reverse primer
  - G= Resequencing of the same clone with forward primer

### Gene models nomenclature

Gene models nomenclature followed the criteria described: Contig or singlet at which a gene model is present; *ab initio* gene finder program (AUGUSTUS, SNAP, Genezilla) or extrinsic prediction (ESTMODELS, BLASTMODELS, COMBINEDMODELS, CURATEDMODELS); position of gene model in the contig sequence.

Contig17878\_BLASTMODELSv1\_g2  
CP02-S2-000-143-B10-UE.F\_Genezilla\_v6x\_g1  
                                  1                                  2                                  3

1. Contig or singlet at which a gene model is present
  - a. Contig17878 (contig)
  - b. CP02-S2-000-143-B10-UE.F (singlet)
2. *Ab initio* gene finder or extrinsic prediction
  - a. *Ab initio*: AUGUSTUS, SNAP, Genezilla
  - b. Extrinsic: ESTMODELS, BLASTMODELS, COMBINEDMODELS, CURATEDMODELS
3. Position of gene model in the contig sequence (from 5' to 3')
  - a. g1: Closer to 5'
  - b. g2: Farther from 5'
